# Supplementary material for: ACCELERATED CELL DEATH 6 Acts on Natural Leaf Senescence and Nitrogen Fluxes in Arabidopsis
Source: PubMed Central journal article supplement (PMC7817547; doi:10.3389/fpls.2020.611170), 2021-01-07
Supplement: Presentation_1.pdf [file Presentation_1.pdf]

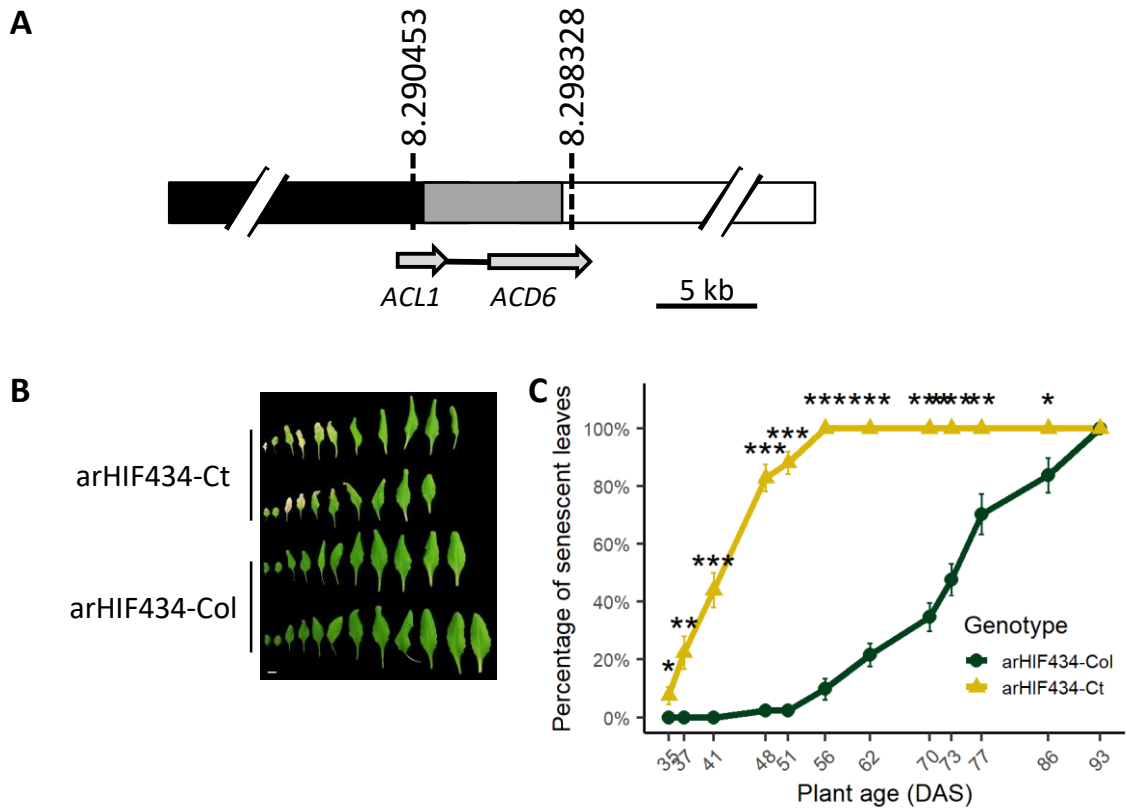

**Supplementary FIGURE 1.** *arHIF434-Ct* displays an earlier leaf senescence than *arHIF434-Col*. **(A)** *arHIF434* is represented with horizontal bars (black for *Col-0* allele, white for *Ct-1* allele, grey for heterozygous). Dashed vertical bars represent markers delimiting the candidate interval on chromosome 4. Numbers correspond to marker position (Mb). Position of *ACL1* and *ACD6* genes are shown above the *arHIF*. **(B)** Rosette leaves of 5-week-old plants. Upper rows: *arHIF434-Ct*, lower rows: *arHIF434-Col*. Scale bar corresponds to 1 cm. **(C)** Percentage of senescent leaves in *arHIF434-Ct* (yellow triangle line) and *arHIF434-Col* (dark green circle line) during the reproductive phase. Flowering transition occurred in average at 23.7 DAS for *arHIF434-Col* and 23.9 DAS for *arHIF434-Ct*.

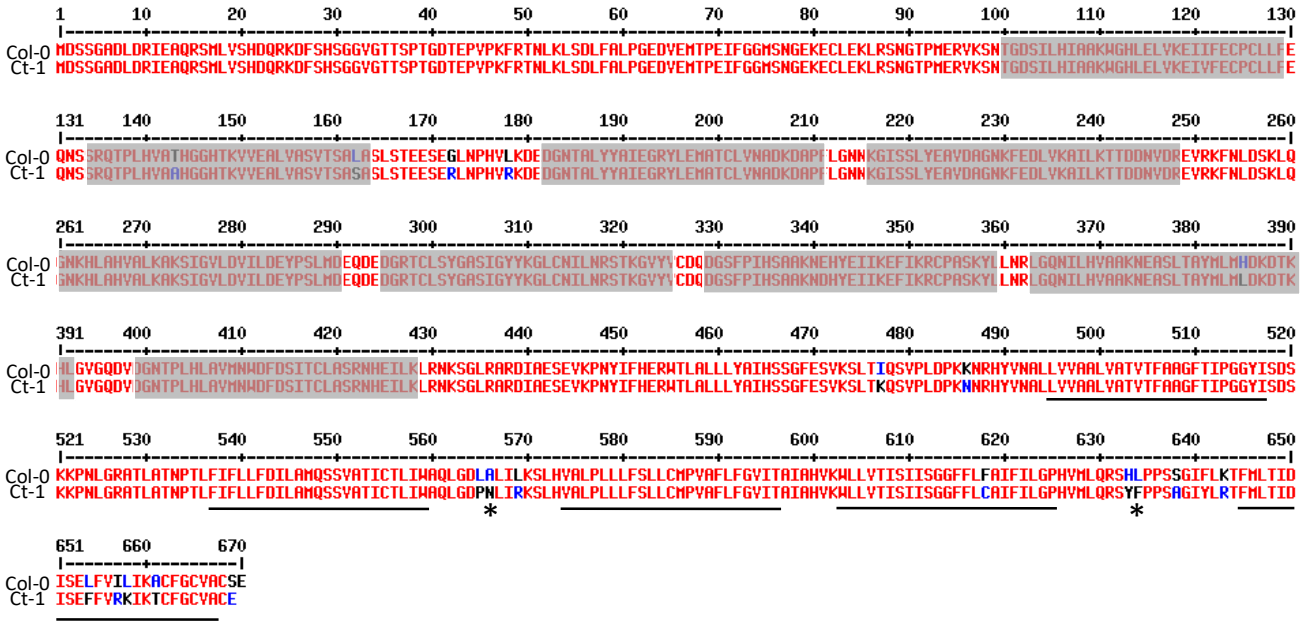

**Supplementary FIGURE 2.** Protein sequence alignment of ACD6 from *Col-0* and *Ct-1* accessions. Numbers indicate amino acid position from the first Methionine. Grey box correspond to ankyrin repeats and black lines to transmembrane domains as predicted using SMART website (<http://smart.embl-heidelberg.de/>).

\* Amino acids 566 and 634.

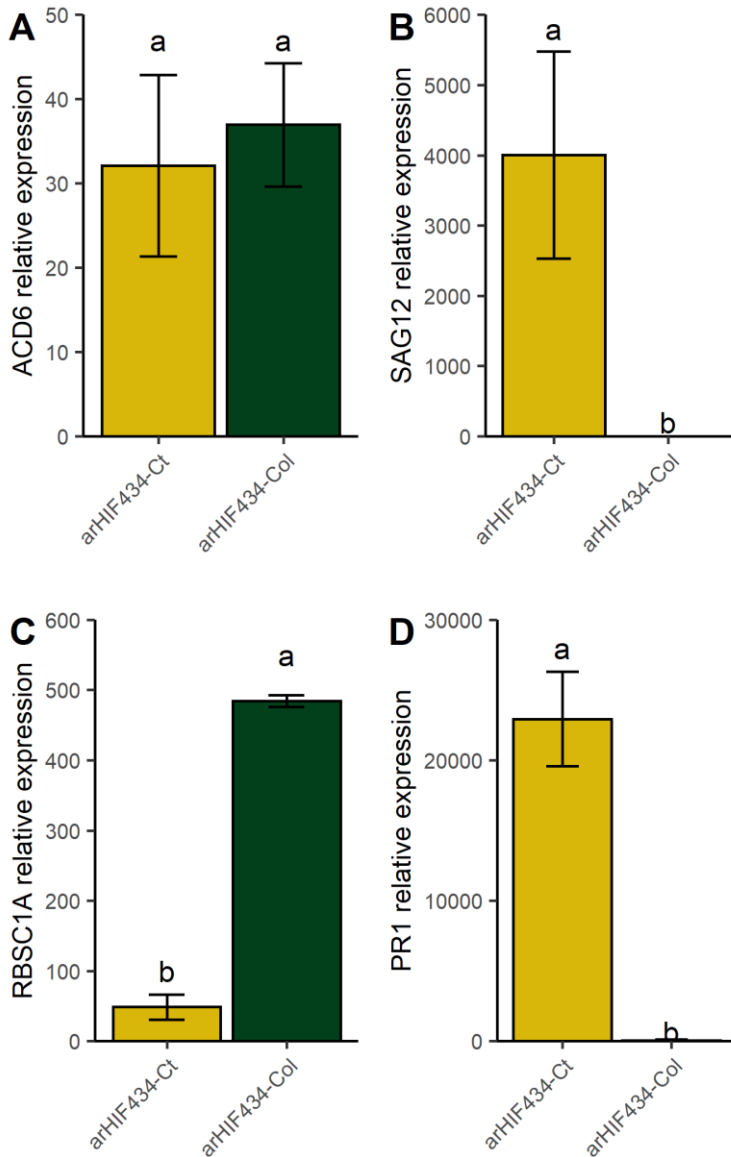

**Supplementary FIGURE 3.** Expression of *ACD6* in *arHIF434-Ct* and *arHIF434-Col*. Plants were grown under long days (8 h light/16 h dark) for 35 d after sowing and then harvested. Transcript levels of *ACD6* (**A**); *SAG12* (**B**) and *RBCS1A* (**C**) marker genes of leaf senescence, and *PR1* (**D**) involved in SA signaling process, were monitored using RT-qPCR and specific primers ([Supplementary Table S1](#)). Expression of *ACD6* was normalized using *PP2AA3* and *APC2*. Expression of *PR1*, *SAG12* and *RBCS1A* were normalized using *PP2AA3*.

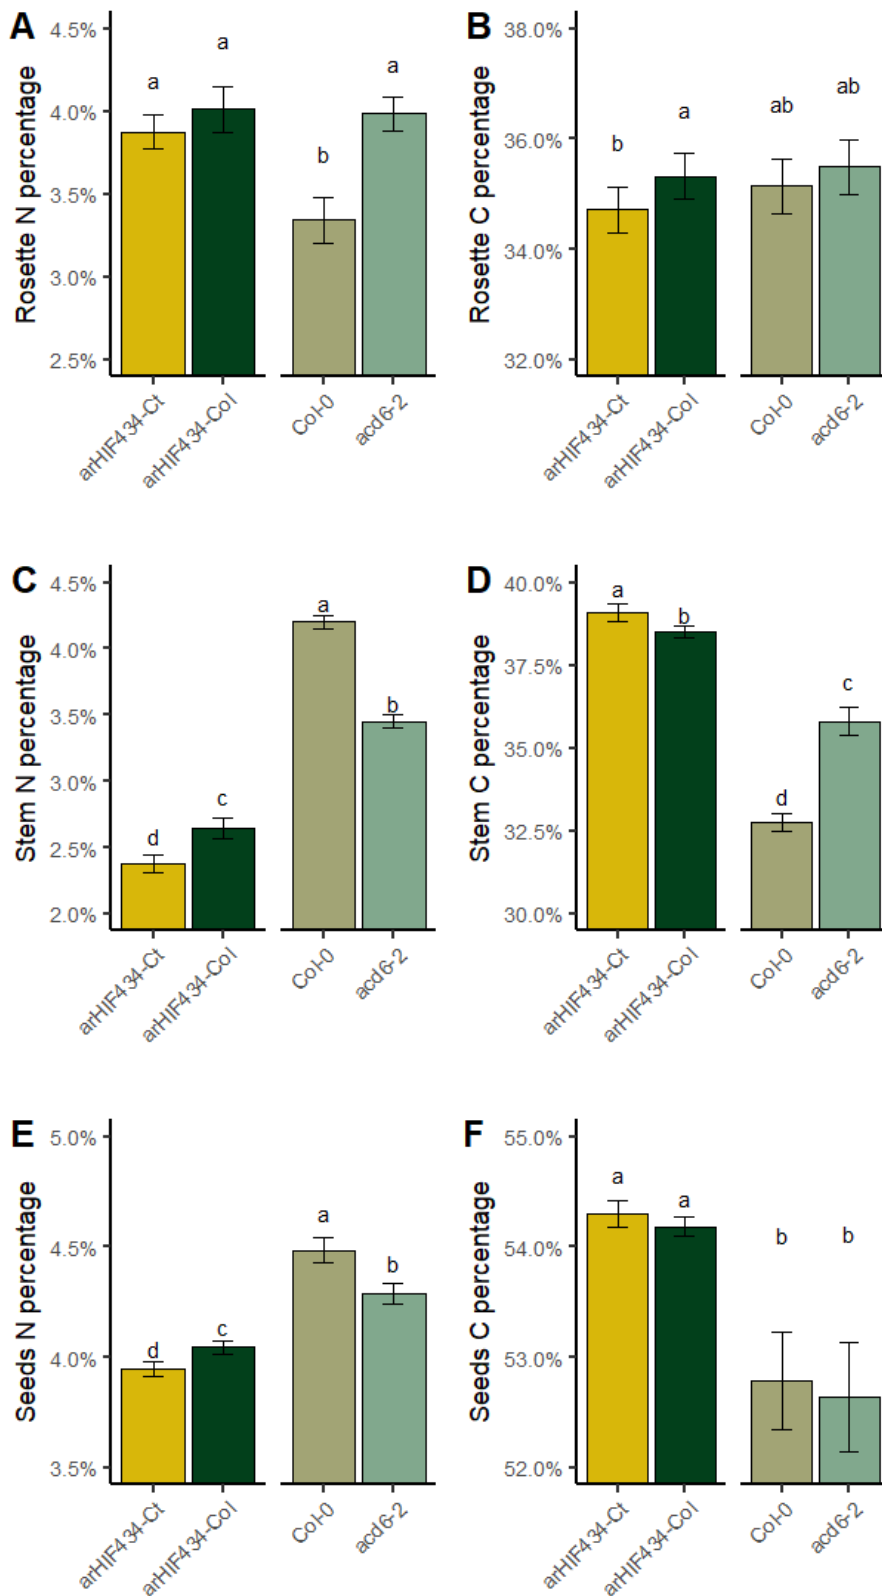

**Supplementary FIGURE 4.** Effect of *ACD6* on N and C percentages in the different parts of the plants. N and C percentages in rosette (**A,B**), stem (**C,D**), and seeds (**E,F**). N and C percentages for the four genotypes (*arHIF434-Ct*, *arHIF434-Col*, *Col-0* and *acd6-2*) are shown. Least-square means from 3 independent experiments  $\pm$  s.e. are shown ( $n \geq 18$  for each genotype). Different letters indicate significant difference (Tukey's test,  $p$ -value  $\leq 0.05$ ).

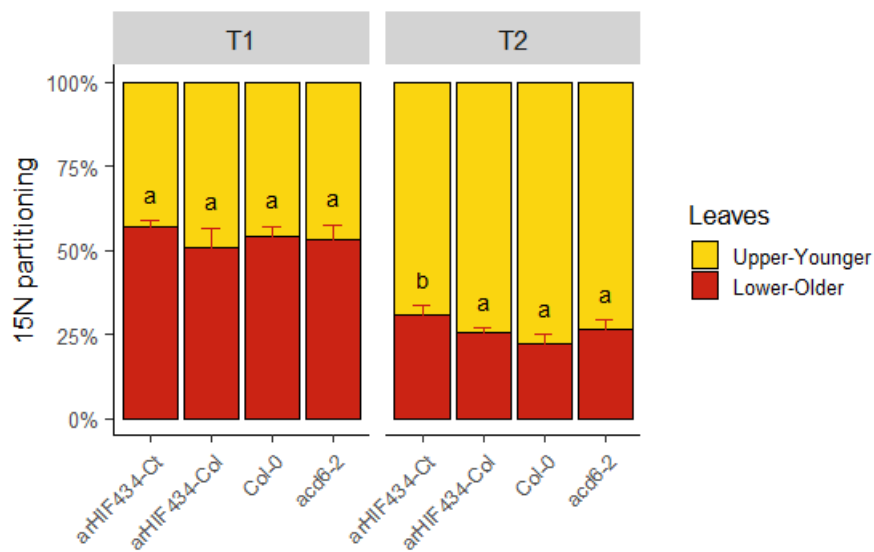

**Supplementary FIGURE 5.** ACD6 does not affect N translocation (T1) and remobilization (T2) from old leaves to young leaves during the vegetative phase. The four genotypes (*arHIF434-Ct*, *arHIF434-Col*, *Col-0* and *acd6-2*) were grown on sand in short day conditions (8 hours). After 48h of labelling with  $^{15}\text{NO}_3$ , lower (ranks 1 to 10) and upper (ranks >10) leaves were harvested and grouped. Proportion of total  $^{15}\text{N}$  is measured in the two groups of leaves, just after the labelling period (T1) to estimate the N translocation, and 7 days after (T2) to estimate the N remobilization from old leaves to young leaves during vegetative phase.
