# Supplementary material for: ACCELERATED CELL DEATH 6 Acts on Natural Leaf Senescence and Nitrogen Fluxes in Arabidopsis
Source: PubMed Central journal article supplement (PMC7817547; doi:10.3389/fpls.2020.611170), 2021-01-07
Supplement: Table_1.pdf [file Table_1.pdf]

**Supplementary Table S1. Primers used for genotyping, RT-PCR and qRT-PCR analyses**

| Gene   | AGI       | Forward Primer                             | Reverse Primer                               | Product size (bp) | Purpose                       |
|--------|-----------|--------------------------------------------|----------------------------------------------|-------------------|-------------------------------|
| ACD6   | AT4G14400 | SALK-045869-RP2:<br>CGCTGGAAATAAATTTGAAGAC | SALK-045869-LP2:<br>CGTAATTTTCAGTATCTCGTGGT  | 740               | <i>acd6-2</i><br>genotyping   |
| ACL1   | AT4G14390 | GABI_108H02-RP:<br>TTTACGCTATCCGTGGTGAAG   | GABI_108H02-LP2:<br>TATACATACAAATATTTTTACCGC | 759               | <i>acl1-1</i><br>genotyping   |
| ACD6   | AT4G14400 | ACD6-F1: TGCACATGTTGCTTTGAAGG              | SeqACD6-R5:<br>TTTTGATGATTTATTCGGAACAC       | 1229              | RT-PCR                        |
| ACL1   | AT4G14390 | At4g14390-For1:<br>CTCAATCTCGTCAACCTTTAG   | At4g14390-Rev1:<br>TTAATAACAACCACAAAAAAGAA   | 2068              | RT-PCR                        |
| ACT2   | AT3G18780 | ActQ1F: GCCATCCAAGCTGTTCTCTC               | ActQ2R: CCCTCGTAGATTGGCACAGT                 | 101               | RT-PCR                        |
| ACD6   | AT4G14400 | ACD6-F3: ATCACTGCAATTGCCCATG               | ACD6-R3: ACACGCCACACAACCAAAA                 | 222               | qRT-PCR                       |
| PP2AA3 | AT1G13320 | PP2A3-For: GCAATCTCTCATTCCGATAGTC          | PP2A3-Rev: ATACCGAACATCAACATCTGG             | 100               | reference gene<br>for qRT-PCR |
| ACP2   | AT2G04660 | ACP2-For:<br>GAAACATCAATTGCCTCTGTGGAAGA    | ACP2-Rev:<br>AAGGATCAGCCACACAAAACATCTTG      | 148               | reference gene<br>for qRT-PCR |
| SAG12  | AT5G45890 | SAG12F: CCCGGTTAATGATGAGCAAGC              | SAG12R: GCTTTCATGGCAAGACCACA                 | 294               | qRT-PCR                       |
| PR1    | AT2G14610 | PR1-F: TCTTCCCTCGAAAGCTCAAGA               | PR1-R: GTGCCTGGTTGTGAACCCTTA                 | 60                | qRT-PCR                       |
| RBCS1A | AT1G67090 | RBCS1aF: ATTGCTACAAGCCACCAAG               | RBCS1aR: ATTTGTAGCCGCATTGTCCT                | 277               | qRT-PCR                       |
