# Supplementary material for: ACCELERATED CELL DEATH 6 Acts on Natural Leaf Senescence and Nitrogen Fluxes in Arabidopsis
Source: PubMed Central journal article supplement (PMC7817547; doi:10.3389/fpls.2020.611170), 2021-01-07
Supplement: Table_2.pdf [file Table_2.pdf]

**Supplementary table S2. Markers used for mapping**

| Marker       | Position on chr. 4 (pb) | Marker type    | SNP * | Forward primer          | Reverse primer          | PCR product size in Col-0 (pb) | Restriction enzyme | Col-0 digestion product | Ct-1 digestion product |
|--------------|-------------------------|----------------|-------|-------------------------|-------------------------|--------------------------------|--------------------|-------------------------|------------------------|
| MSAT4.07180  | 7.180000                | microsatellite | n/a   | GTCAGAGCCCAAGTCCAGAG    | AAGCTTTTGGGATAACGAATGA  | 172                            | n/a                | n/a                     | n/a                    |
| MSAT4.07636b | 7.636981                | microsatellite | n/a   | CTCCATTAGAGACATCCTCGG   | ACTAACTCGGAGACAAACCGG   | 325                            | n/a                | n/a                     | n/a                    |
| IND4.07732   | 7.732971                | indel          | n/a   | GCAGTGAAGTGCAATCCTGA    | CTCTGCTCATAGATCCCATACG  | 294                            | n/a                | n/a                     | n/a                    |
| IND4.07847   | 7.847209                | indel          | n/a   | TCAATCTTGC GCACTCAAAC   | TGAATCTTGGCCGAATAAGG    | 207                            | n/a                | n/a                     | n/a                    |
| MSAT4.08053  | 8.050000                | microsatellite | n/a   | ATTCTCACTGTCGGCTGCTT    | GCAATAGCCACCAAGCATTT    | 243                            | n/a                | n/a                     | n/a                    |
| IND4.08100   | 8.100321                | indel          | n/a   | TCGCAAACACACAGTGACAA    | CAAAACCGGGTCGAATTATG    | 283                            | n/a                | n/a                     | n/a                    |
| IND4.08139   | 8.139434                | indel          | n/a   | AGAACTTCCCCATGCTTTTCA   | ACGTTTGTCAATTTGCCAA     | 136                            | n/a                | n/a                     | n/a                    |
| IND4.08211   | 8.211624                | indel          | n/a   | CCAATCATAACCTGCATCCA    | TGTTGAAAAGTCTGATCCGA    | 237                            | n/a                | n/a                     | n/a                    |
| IND4.08252   | 8.252361                | indel          | n/a   | TCAACAACAACACGAAACAAGT  | TCCAGAATCTGTCCAAGCGA    | 484                            | n/a                | n/a                     | n/a                    |
| MSAT4.08286  | 8.286213                | microsatellite | n/a   | CAAAGCGTCGTCAGTATGGA    | ACTCGTCGGCTCTCTCGTTA    | 243                            | n/a                | n/a                     | n/a                    |
| IND4.08288b  | 8.288836                | indel          | n/a   | ACCGTTGCCTGATTTGAGTC    | CATGCAATGCCAACTCTTTG    | 250                            | n/a                | n/a                     | n/a                    |
| IND4.08288c  | 8.288840                | indel          | n/a   | ACCGTTGCCTGATTTGAGTC    | CATGCAATGCCAACTCTTTG    | 250                            | n/a                | n/a                     | n/a                    |
| IND4.08288d  | 8.288991                | indel          | n/a   | TCAGCCAAAGAGTTGGCATT    | AGATTCAATGGGATCGCAA     | 133                            | n/a                | n/a                     | n/a                    |
| IND4.08289   | 8.289003                | indel          | n/a   | TCAGCCAAAGAGTTGGCATT    | AGATTCAATGGGATCGCAA     | 133                            | n/a                | n/a                     | n/a                    |
| SNP4.08290   | 8.290138                | CAPS           | G::A  | ATAGAATTGAGGCACAAAGGTCA | AATGCAGCTGCTACTGGTTAAAG | 863                            | NcoI               | 863                     | 275, 588               |
| SNP4.08290b  | 8.290145                | CAPS           | T::G  | ATAGAATTGAGGCACAAAGGTCA | AATGCAGCTGCTACTGGTTAAAG | 863                            | ApoI               | 280, 583                | 863                    |
| SNP4.08290c  | 8.290182                | CAPS           | A::G  | ATAGAATTGAGGCACAAAGGTCA | AATGCAGCTGCTACTGGTTAAAG | 863                            | TasI               | 396, 276, 148 (39, 4)   | 711, 148 (4)           |
| SNP4.08290d  | 8.290453                | CAPS           | G::A  | ATAGAATTGAGGCACAAAGGTCA | CAACCATTATATCTCGCTCGTC  | 1032                           | Bsp143II           | 593, 439                | 917, 115               |
| SNP4.08291   | 8.291555                | CAPS           | C::T  | AGAGAGAGGTGAAACCCCACTAC | GAATGAGCACTGGATCACCTAAC | 457                            | HpaI               | 457                     | 231, 226               |
| SNP4.08292   | 8.292439                | CAPS           | T::G  | GCTACAACGGTCATACGTTTCTC | AAATTTTCATGTTTGTGGTGG   | 611                            | NlaIII, HinI II    | 481 (65, 58, 7)         | 539 (65, 7)            |
| SNP4.08293   | 8.293857                | CAPS           | T::G  | TCCGATAGTCATAGCCTCAGAAC | CCACCACACACAGATTTTCATA  | 827                            | HindIII            | 600, 227                | 827                    |
| SNP4.08296   | 8.296497                | sequencing     | A::G  | ATGGCTCTGAACGATTGTCT    | TTCACCTCTGACTCGGCAAT    | 2238                           | n/a                | n/a                     | n/a                    |
| SNP4.08297   | 8.297287                | CAPS           | A::T  | GAAAGCAATTTTAAAACCCACAG | GTGGAGAATGTTCTGACCAAGTC | 531                            | MboI               | 376, 155                | 376 (87, 68)           |
| SNP4.08297b  | 8.297418                | sequencing     | A::T  | ATGGCTCTGAACGATTGTCT    | TTCACCTCTGACTCGGCAAT    | 2238                           | n/a                | n/a                     | n/a                    |

|             |           |                |      |                         |                           |     |         |          |          |
|-------------|-----------|----------------|------|-------------------------|---------------------------|-----|---------|----------|----------|
| SNP4.08298  | 8.298328  | CAPS           | G::A | ATGGCTTTTAGTCACCATTAGCA | CTCATCTCCTTTGAATGTGGTTC   | 489 | HindIII | 315, 174 | 489      |
| SNP4.08298b | 8.298474  | CAPS           | C::T | ATGGCTTTTAGTCACCATTAGCA | CTCATCTCCTTTGAATGTGGTTC   | 489 | EcoRI   | 489      | 319, 170 |
| IND4.08300  | 8.300260  | indel          | n/a  | TCGTCCTTTTCGCACTCTTCT   | TCAAGTTCTGCTCCATTGCT      | 340 | n/a     | n/a      | n/a      |
| IND4.08302  | 8.301657  | indel          | n/a  | CCGTTTGGCAAGTGTAAGC     | GAGACCCGTTTAGTAAGCG       | 201 | n/a     | n/a      | n/a      |
| IND4.08303  | 8.302712  | indel          | n/a  | CGAAGGAACAGTTGGTGCAT    | TGCCACCAGTCGATGTATGT      | 223 | n/a     | n/a      | n/a      |
| IND4.08312  | 8.312050  | indel          | n/a  | TTCGGATTTTGCAGGCTATT    | TTTTTCTTTCGGTTGGTTCA      | 237 | n/a     | n/a      | n/a      |
| IND4.08329  | 8.329176  | indel          | n/a  | CTCTTCTGCGTCTGGTTGG     | CGAAGTGGCTGCAATCAAGT      | 231 | n/a     | n/a      | n/a      |
| IND4.08337  | 8.337487  | indel          | n/a  | TCTGGTGTGTAGAGGATGCA    | TCAGGCCAACGGTTCATAT       | 100 | n/a     | n/a      | n/a      |
| IND4.08348  | 8.348064  | indel          | n/a  | TTCAAAATCTTTTGGAAACCA   | CCTCTTATTTTCTCATTTATTGGC  | 158 | n/a     | n/a      | n/a      |
| IND4.08360  | 8.360331  | indel          | n/a  | TGAGACAGCATATCACATGGC   | CGTGAAAAGTAATGTTTGTTTGC   | 237 | n/a     | n/a      | n/a      |
| IND4.08363  | 8.363944  | indel          | n/a  | TAAGAGCATAAGCAGCGGGT    | TTGCTGTGAGGGAAGGAAAC      | 247 | n/a     | n/a      | n/a      |
| IND4.08370  | 8.370202  | indel          | n/a  | TGGTGTTACGTTTCGGTTT     | CATACGTTCTCTGTCGGCAA      | 172 | n/a     | n/a      | n/a      |
| IND4.08378  | 8.378231  | indel          | n/a  | CGTGGTTCTTTTCGCTCTCC    | TCGAACCCAGGAAGAGCTTT      | 492 | n/a     | n/a      | n/a      |
| IND4.08405  | 8.405044  | indel          | n/a  | GGACTTTAATCATCTTGCATTCC | AACAATGATTTGGTCCGATTG     | 271 | n/a     | n/a      | n/a      |
| IND4.08435  | 8.435557  | indel          | n/a  | GCATACGATCAATTTGCATGTG  | AAGTGTGCAATGCTGGAGG       | 266 | n/a     | n/a      | n/a      |
| IND4.08510  | 8.510210  | indel          | n/a  | GAAGTGTCATCGGCGTATACAA  | ATGGAATATGGATGTAGAAATTGAT | 249 | n/a     | n/a      | n/a      |
| IND4.08708  | 8.708469  | indel          | n/a  | CGCTTCATCCACACTCGTA     | TGACTCGCTCATTGTACAT       | 371 | n/a     | n/a      | n/a      |
| IND4.08893  | 8.893212  | indel          | n/a  | GATCGATAATGGCAAGCTTCA   | TTCTCGAAGAGCAATGGTT       | 299 | n/a     | n/a      | n/a      |
| IND4.09009  | 9.009538  | indel          | n/a  | GGCACTGGCCTTTGAGATAA    | TCACCCTTGTTGATGACACG      | 125 | n/a     | n/a      | n/a      |
| IND4.09096  | 9.096196  | indel          | n/a  | ACCACCGGAGGCTCTAAAGT    | CCCCTCGCCTTGAAAATTA       | 356 | n/a     | n/a      | n/a      |
| MSAT4.09355 | 9.355318  | microsatellite | n/a  | TGGAACAGAGCTTGCATTTG    | TGGGGGTTTGTGAAAAAGAG      | 240 | n/a     | n/a      | n/a      |
| MSAT4.10    | 9.969057  | microsatellite | n/a  | GGTAATTTTCTTGAGACCC     | CTAACTAGATCGTCCCTCGT      | 223 | n/a     | n/a      | n/a      |
| IND4.10019  | 10.019563 | indel          | n/a  | ATGCCGTCAAACCAAGAATC    | GCCATGATTAACGTCGACAA      | 294 | n/a     | n/a      | n/a      |
| IND4.10161  | 10.161619 | indel          | n/a  | ATGAAGAACCTCCGATGCTT    | TCCCGAACCTTCTTTTCAG       | 287 | n/a     | n/a      | n/a      |
| IND4.10237  | 10.237173 | indel          | n/a  | TTGGAGATTCTTTGGTTGG     | GCTAGGATCCAATGTGATGGA     | 252 | n/a     | n/a      | n/a      |
| IND4.10256  | 10.256562 | indel          | n/a  | GGTGCATTTCGGAGAAAAGAA   | ATTCTCAAGGCAAAACGTG       | 227 | n/a     | n/a      | n/a      |
| IND4.10293  | 10.292719 | indel          | n/a  | AGGCAAATGCCTAATCATGG    | ATCGGACGTGCATAGGTTTC      | 273 | n/a     | n/a      | n/a      |
| IND4.10312  | 10.312013 | indel          | n/a  | GGGAAGAATCGGGAAACAAT    | GTTGCGTTCCAATGGTTCTT      | 264 | n/a     | n/a      | n/a      |
| IND4.10328  | 10.328248 | indel          | n/a  | GTCCGGAAAGAGTCATCTCG    | AATGGCAACATGGCTACACA      | 229 | n/a     | n/a      | n/a      |

|             |           |                |     |                         |                        |     |     |     |     |
|-------------|-----------|----------------|-----|-------------------------|------------------------|-----|-----|-----|-----|
| IND4.10387  | 10.387227 | indel          | n/a | CAAGAAGGCAATATCGGACA    | GACGCAATTTGGCTGATTCT   | 191 | n/a | n/a | n/a |
| IND4.10420  | 10.420987 | indel          | n/a | TTCGCTTGGTATGGCTTTTC    | CAGCCGCTATGATGTCACAA   | 229 | n/a | n/a | n/a |
| IND4.10459  | 10.459982 | indel          | n/a | TCCGGATCACAAGTTCCAAT    | GTTAGGTGGACGATCCGAAA   | 282 | n/a | n/a | n/a |
| MSAT4.10609 | 10.609386 | microsatellite | n/a | AAATTTGCATCAACCCCAAC    | CGGTCTTGCCACTAGCACTT   | 237 | n/a | n/a | n/a |
| MSAT4.11288 | 11.290000 | microsatellite | n/a | GTCGTCTTTTCATTGCTGT     | TTGGATTTGATTGCATACC    | 225 | n/a | n/a | n/a |
| CIW7        | 11.524362 | microsatellite | n/a | AATTTGGAGATTAGCTGGAAT   | CCATGTTGATGATAAGCACAA  | 130 | n/a | n/a | n/a |
| IND4.12333  | 12.330000 | indel          | n/a | CGAATTCCTTAAACAATCAAAGC | TCCGGGTTACTGGAGAAGAA   | 149 | n/a | n/a | n/a |
| IND4.12459  | 12.459179 | indel          | n/a | ACACCAATTGGGGATCAAAG    | TGAAACTTGTTTGGTTTTGAGG | 318 | n/a | n/a | n/a |
| MSAT4.13079 | 13.079020 | microsatellite | n/a | TACTTCGCCACCGTGTGTAA    | GTCCGCAACAAACCTTGACT   | 136 | n/a | n/a | n/a |

\*SNP: Col.:Ct
